# Supplementary material for: Super-enhancer-driven ZFP36L1 promotes PD-L1 expression in infiltrative gastric cancer
Source: PubMed Central journal article supplement (PMC11458174; doi:10.7554/elife.96445), 2024-10-07
Supplement: elife-96445-fig2-data1.pdf [file elife-96445-fig2-data1.pdf]

**Fig.2H**

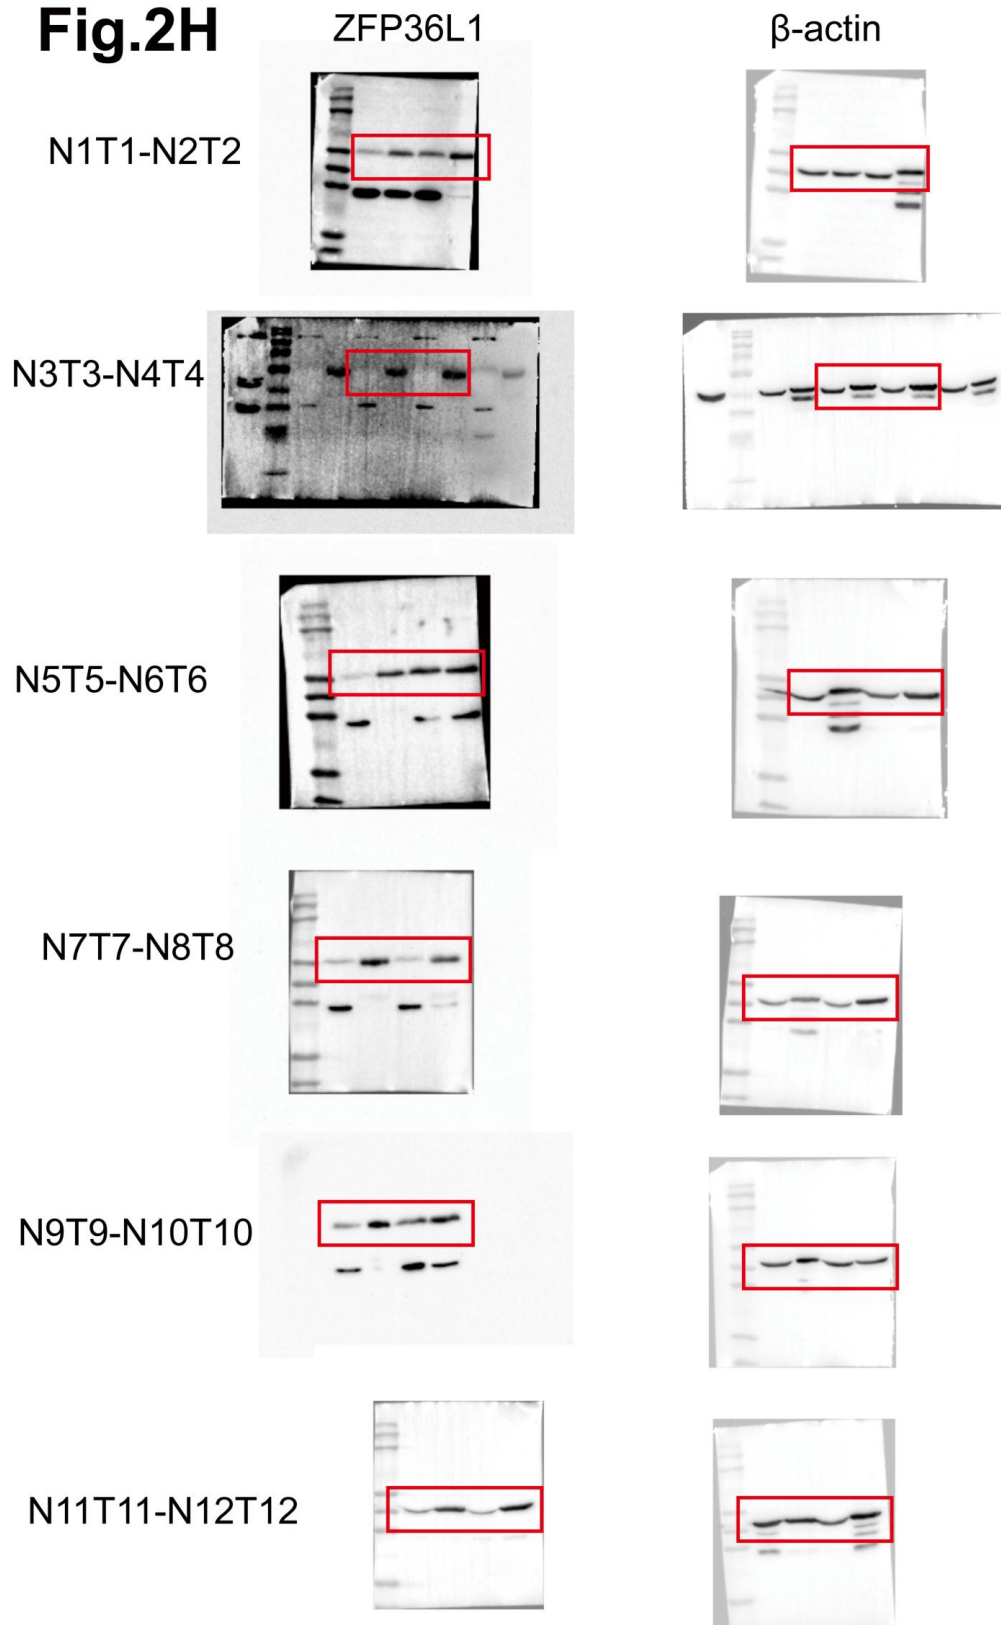

**Fig.2I**

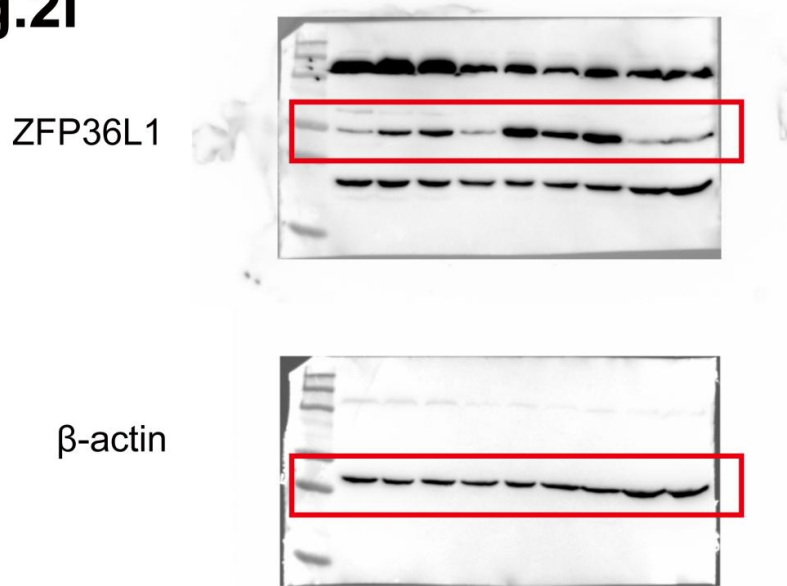

**Fig.2J**

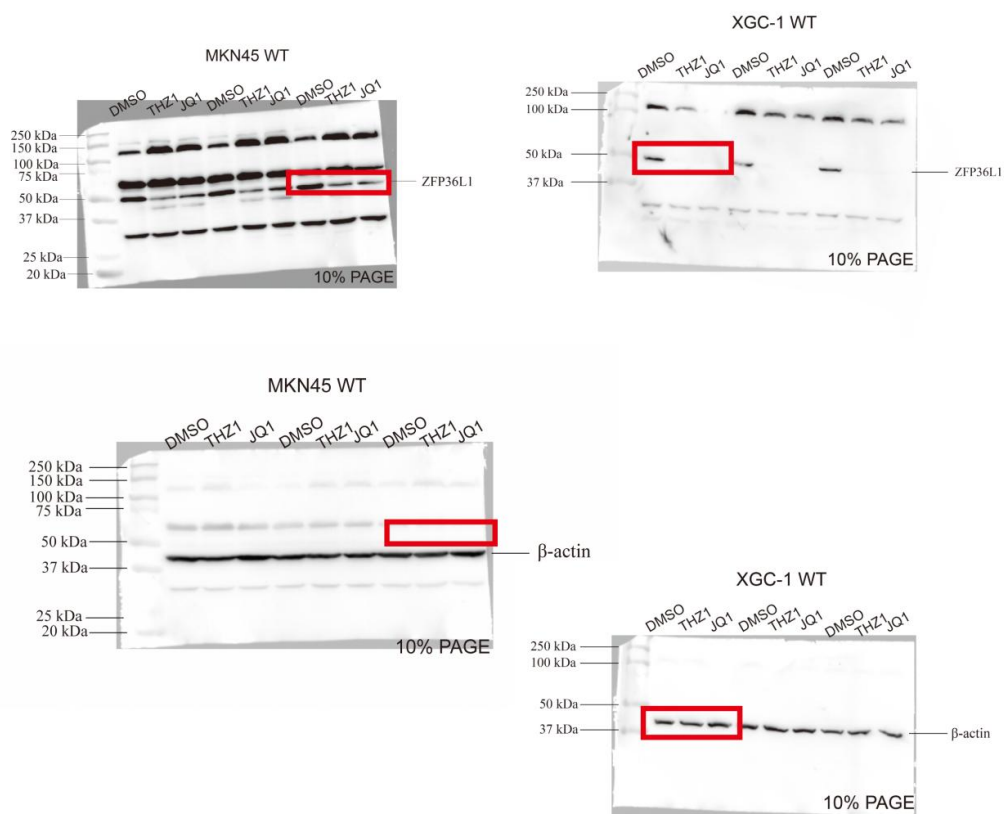

**Figure 2, Source Data 1.** Original membranes corresponding to Figure 2
