# Supplementary material for: Super-enhancer-driven ZFP36L1 promotes PD-L1 expression in infiltrative gastric cancer
Source: eLife journal article supplement (doi:10.7554/elife.96445), 2024-08-08
Supplement: fig3-data1 [file elife-96445-fig3-data1-v1.pdf]

# Fig.3C

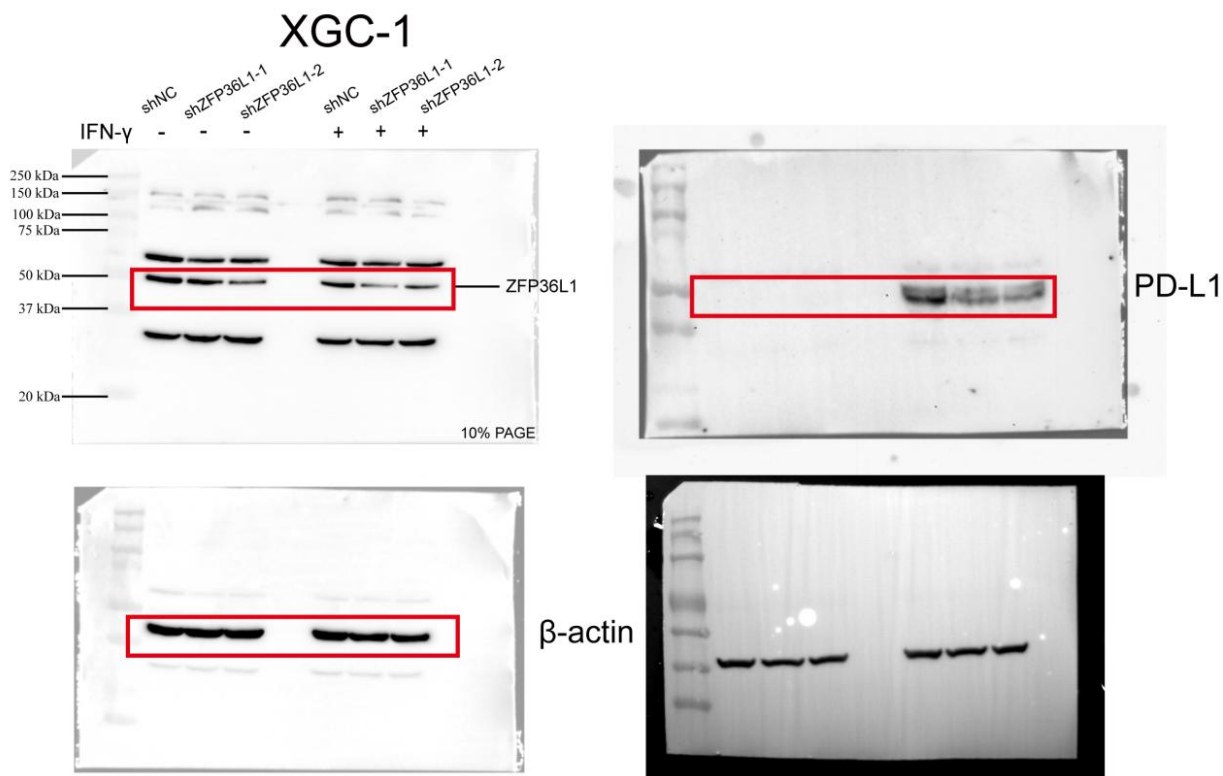

## MKN45

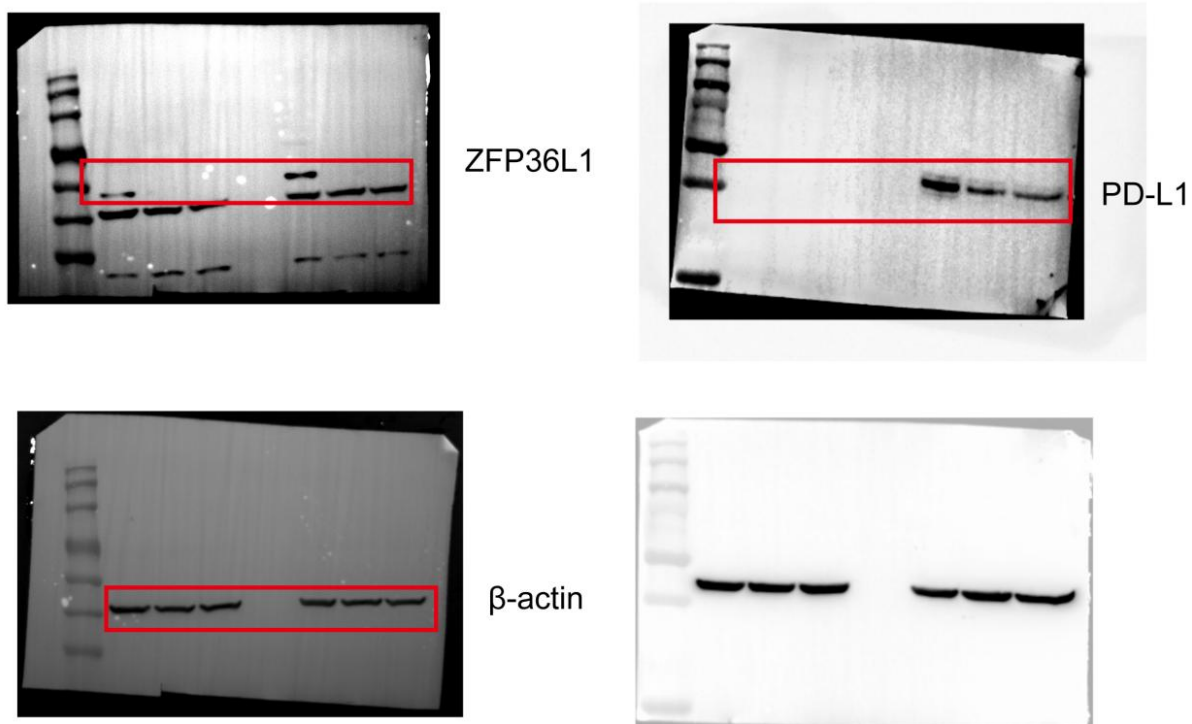

# Fig.3D

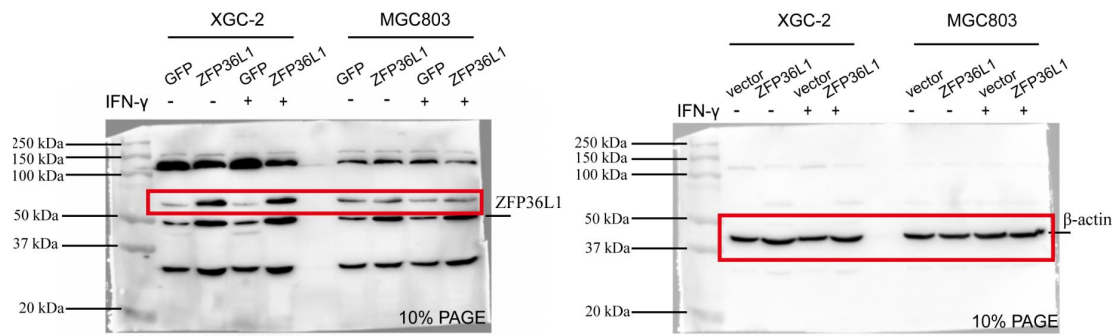

Figure 3, Source Data 1. Original membranes corresponding to Figure 3
