# Supplementary material for: Super-enhancer-driven ZFP36L1 promotes PD-L1 expression in infiltrative gastric cancer
Source: eLife journal article supplement (doi:10.7554/elife.96445), 2024-08-08
Supplement: fig4-data1 [file elife-96445-fig4-data1-v1.pdf]

# Fig.4D

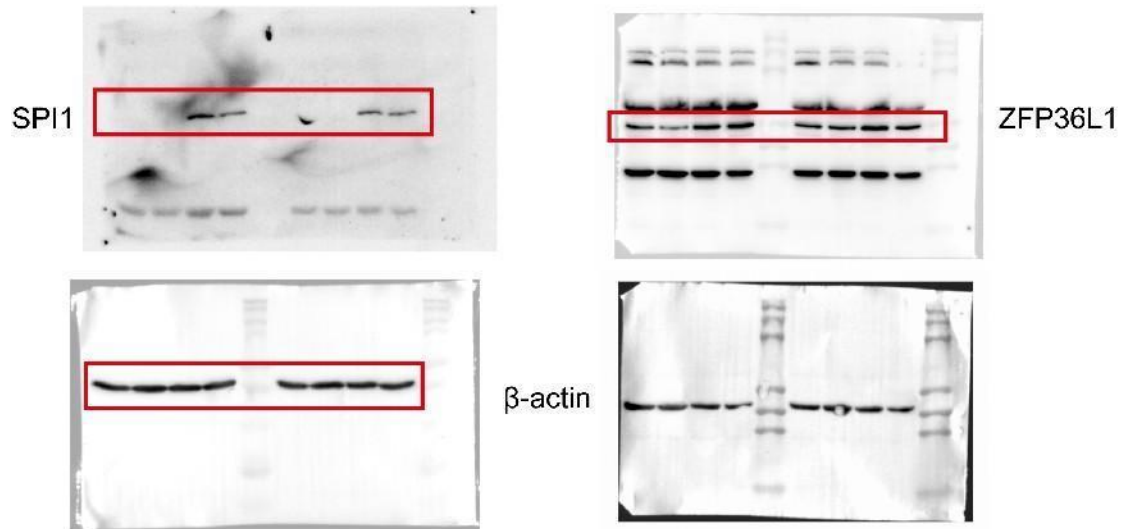

# Fig.4H

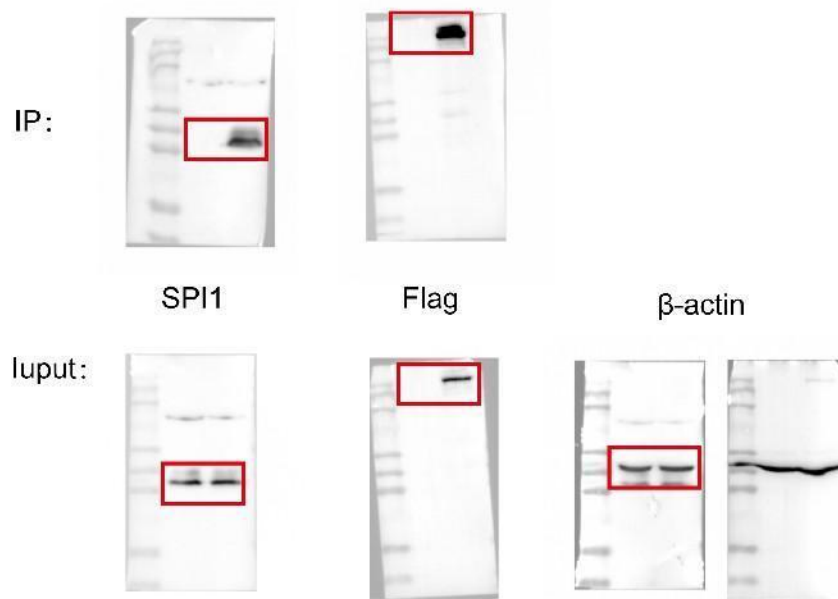

**Fig.4F**

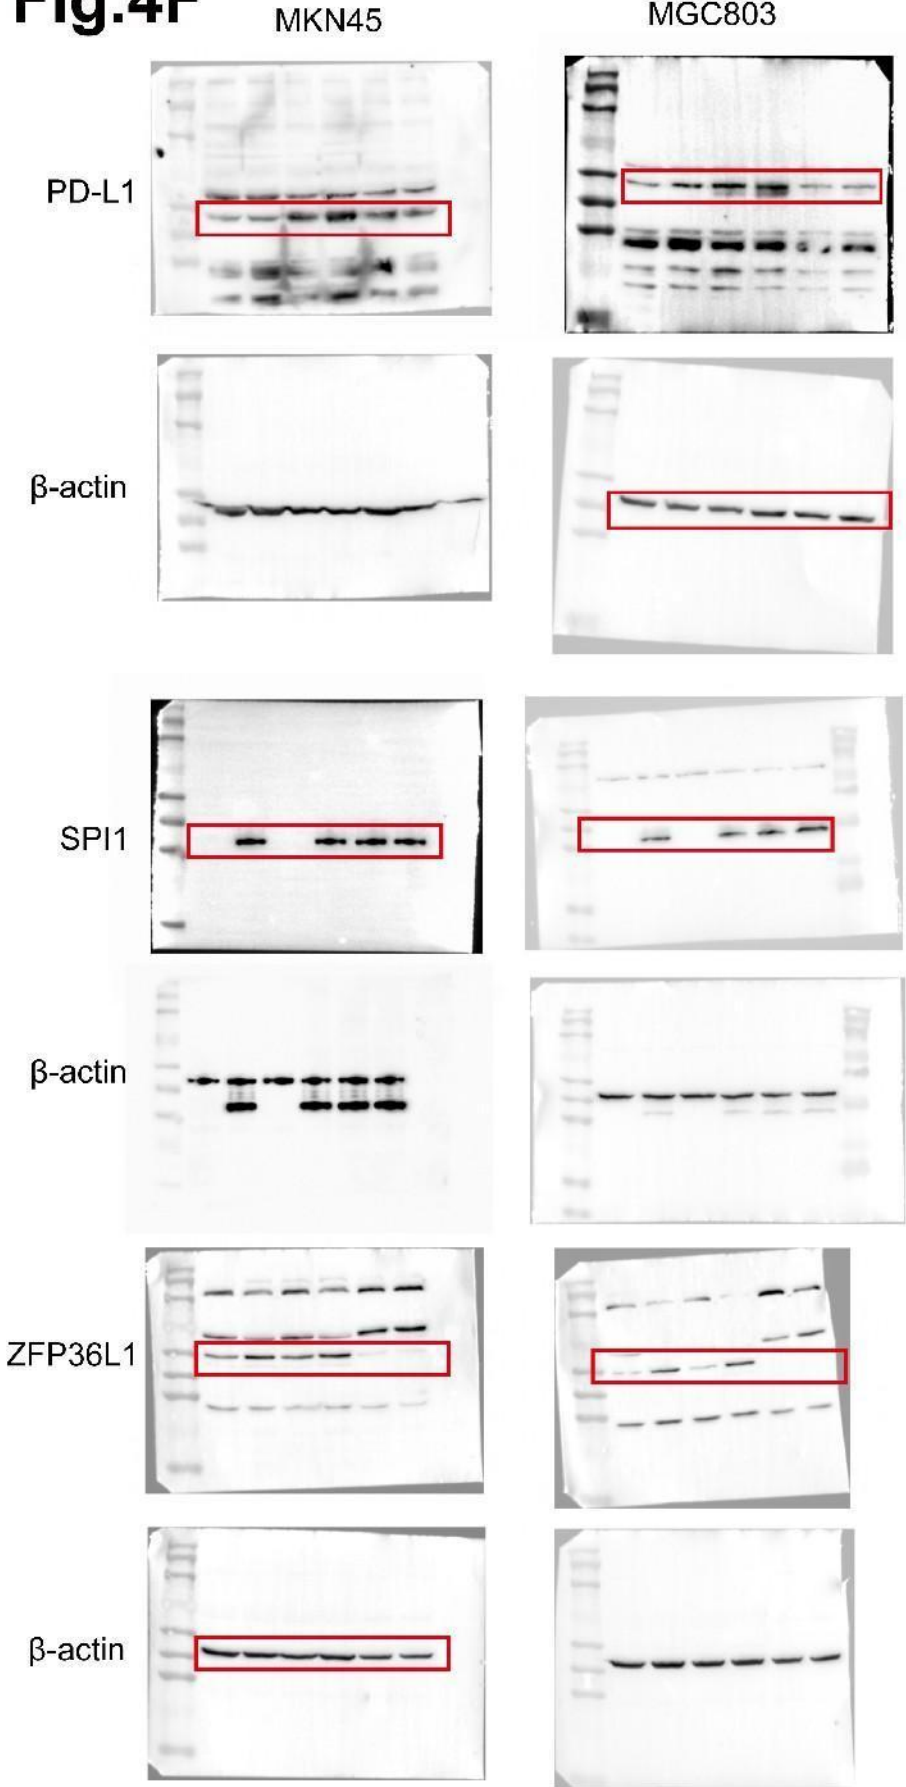

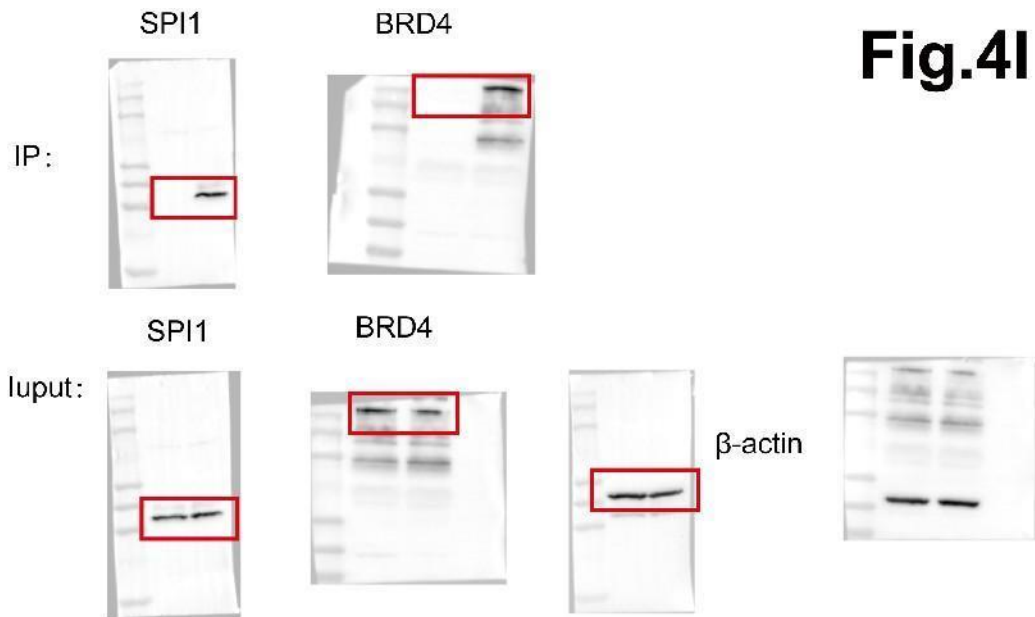

**Fig.4J**

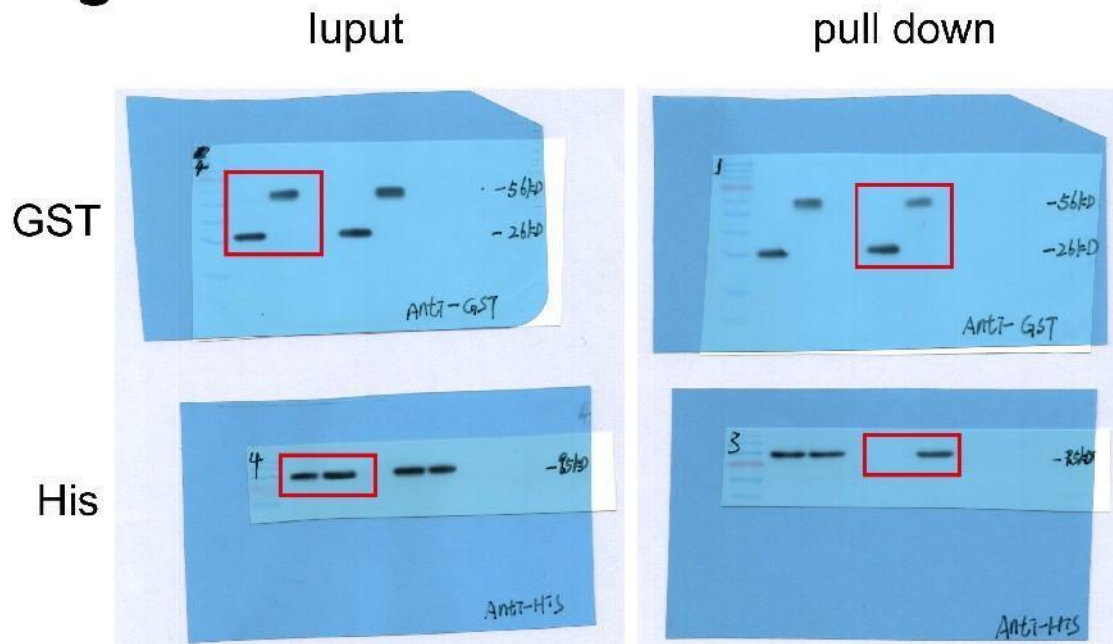

Figure 4, Source Data 1. Original blots corresponding to Figure 4
