# Supplementary material for: Super-enhancer-driven ZFP36L1 promotes PD-L1 expression in infiltrative gastric cancer
Source: eLife journal article supplement (doi:10.7554/elife.96445), 2024-08-08
Supplement: fig5-data1 [file elife-96445-fig5-data1-v1.pdf]

**Fig.5C**

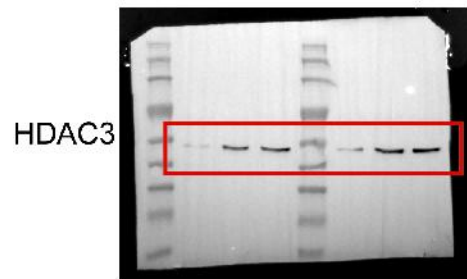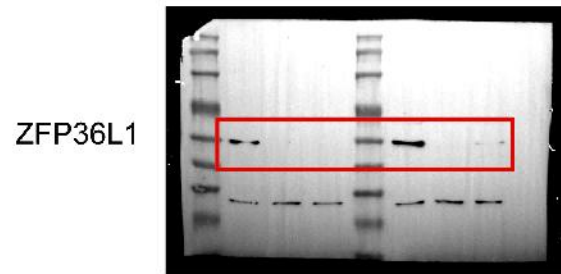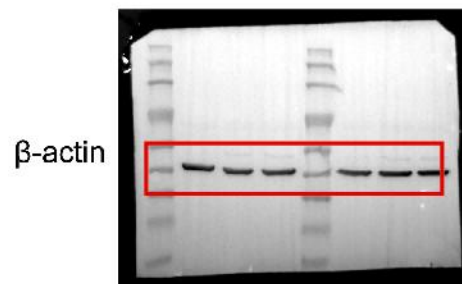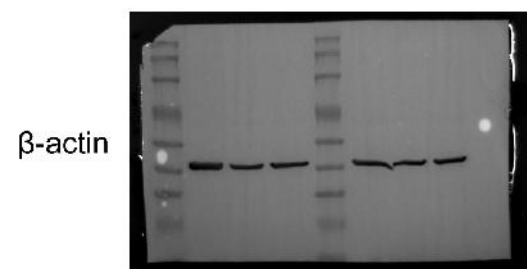

**Fig.5E**

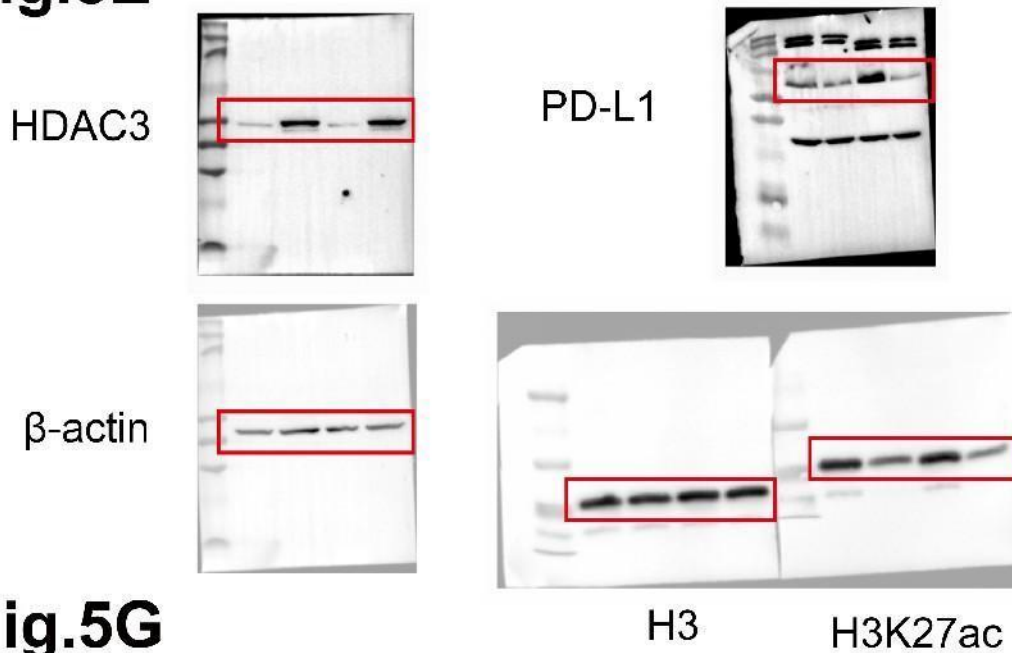

**Fig.5G**

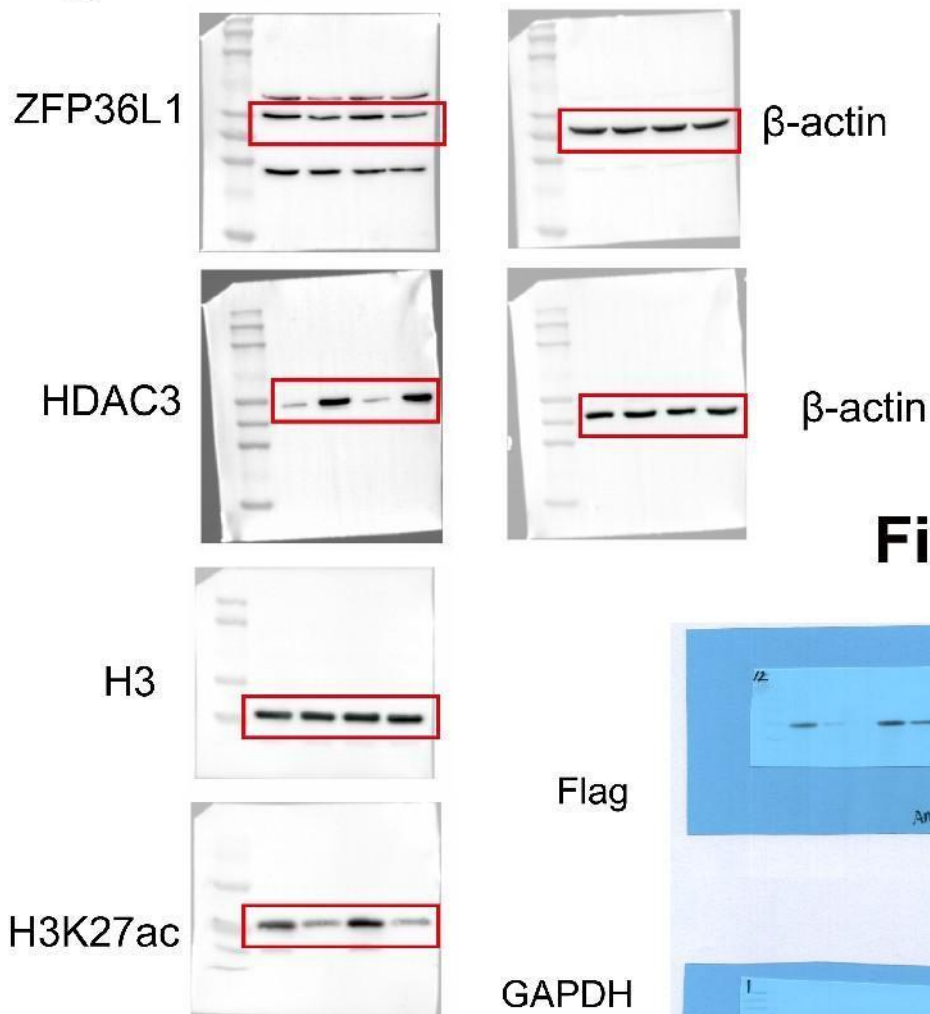

**Fig.5P**

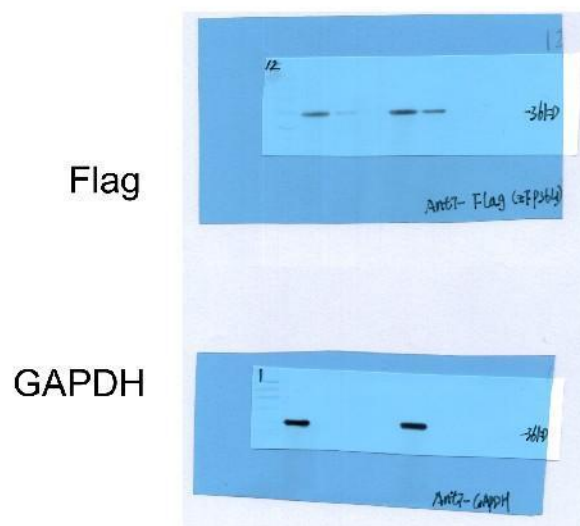

**Fig.5I**

MGC803

XGC-2

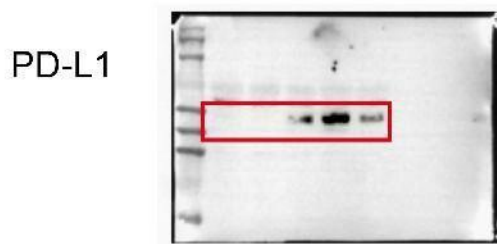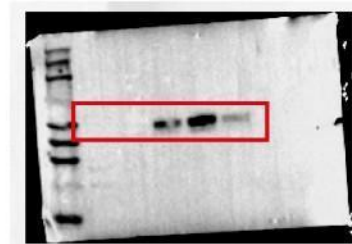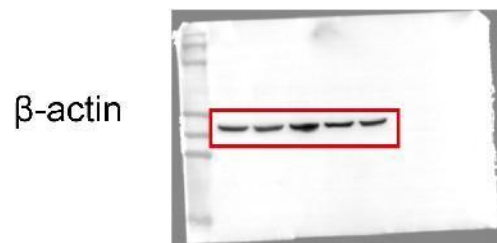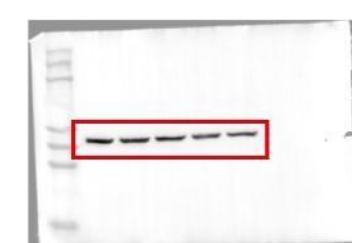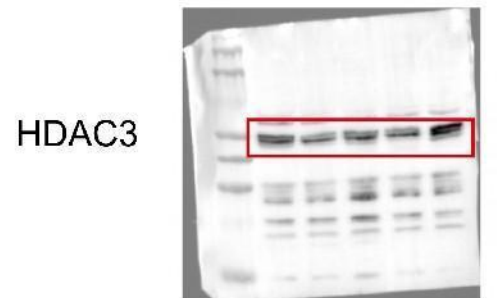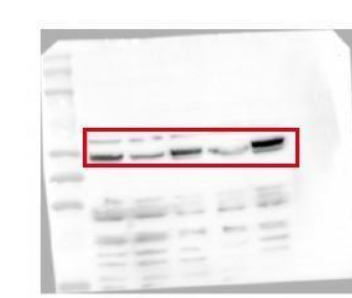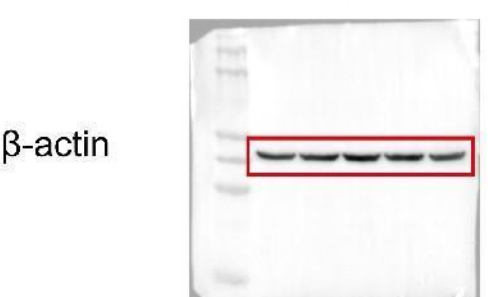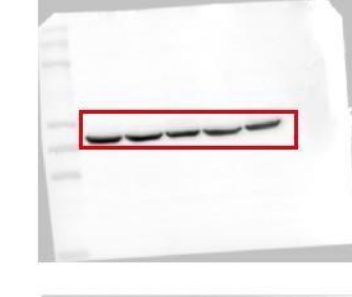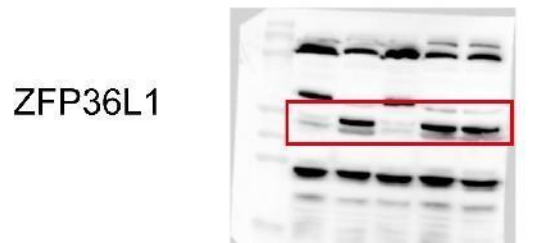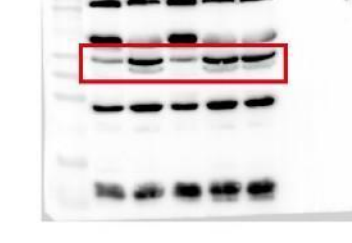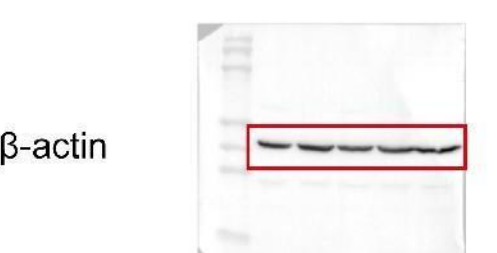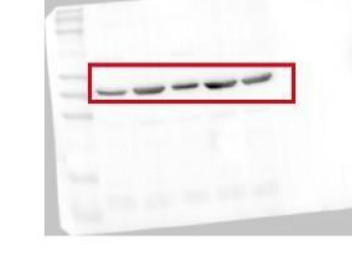

**Fig.5K**

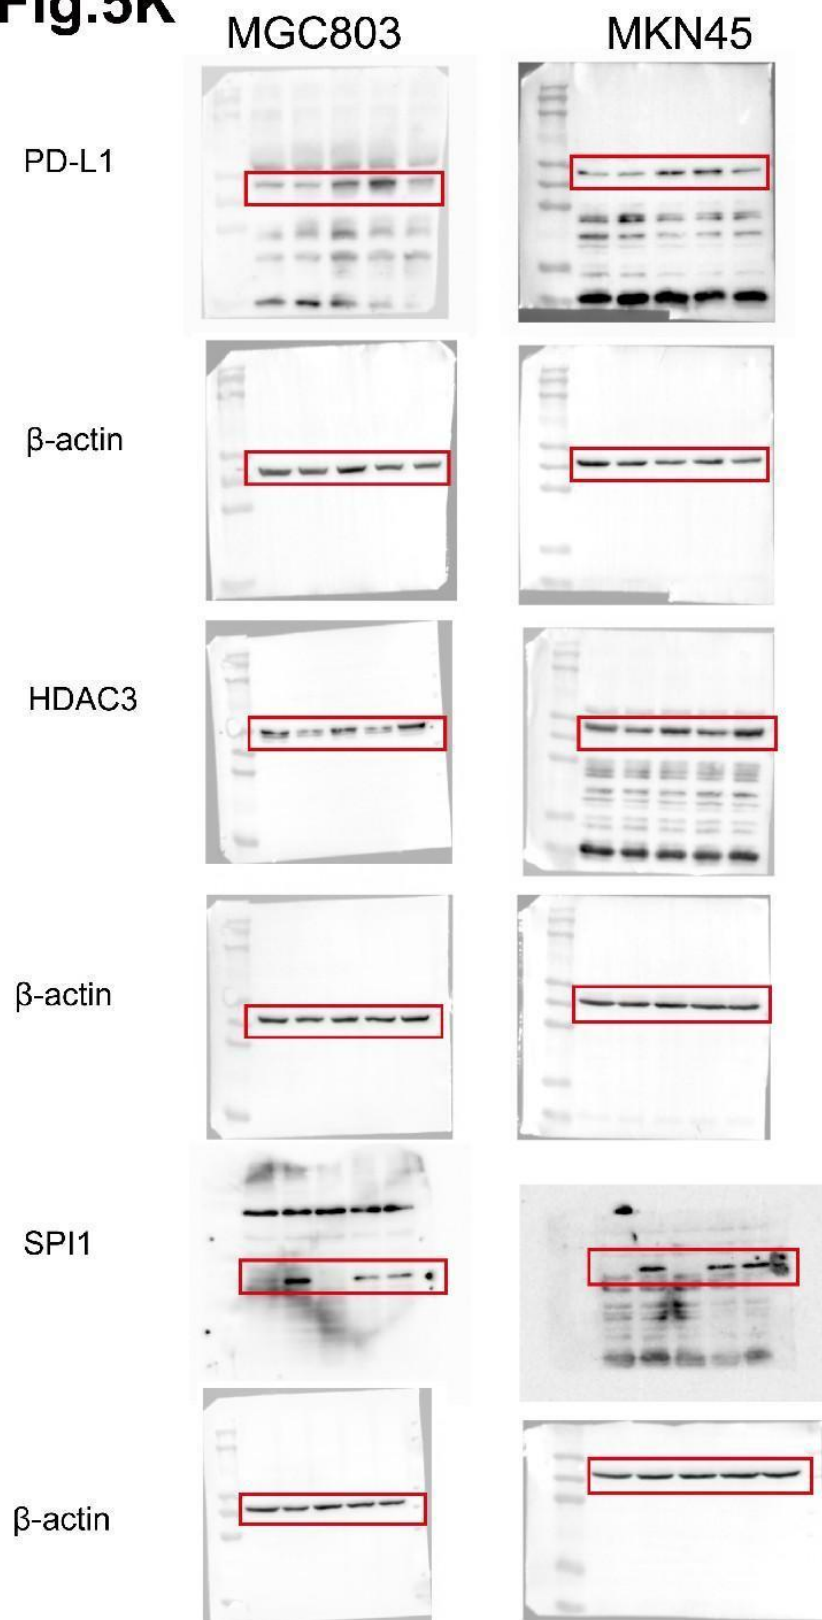

**Figure 5, Source Data 1.** Original blots corresponding to Figure 5
